1 **TITLE PAGE:**

2

3 **Type of the Study: Original Research Article**

4

5 **Title: Association of quantified cardiovascular health with all-cause mortality in prediabetic**  
6 **patients**

7

8 **Short Runnine Title: Association of LE-8 with mortality in prediabetic patients**

9

10 **Authors:**

11 Aomiao Chen, UNDERGRADUATE<sup>1,2,4†</sup>

12 Qiuyu He, UNDERGRADUATE<sup>1,2,4†</sup>

13 Yichuan Wu, UNDERGRADUATE<sup>1,3,4†</sup>

14 Jiaqi Chen, MD<sup>1,2</sup>

15 Xiaoqin Ma, MD<sup>1,2</sup>

16 Lingyuan Hu, UNDERGRADUATE<sup>1,2,4</sup>

17 Geningyue Wang, UNDERGRADUATE<sup>1,3,4</sup>

18 Zhuotong Wang, UNDERGRADUATE<sup>1,2,4</sup>

19 Zongji Zheng, MD, Attending Physician<sup>1,2,4\*</sup>

20 Yijie Jia, MD, Attending Physician<sup>1,2,4\*</sup>

21

22 **Affiliations:**

23 1: Department of Endocrinology & Metabolism, Nanfang Hospital.Southern Medical University,  
24 Guangzhou, China

25 2: The First School of Clinical Medicine, Southern Medical University, Guangzhou, China

26 3: School of Stomatology, Southern Medical University, Guangzhou, China

27 4: De Feng Academy, Southern Medical University, Guangzhou, China

28 †: These authors contributed equally to this work

29 \*: Corresponding Author

30

31 **Correspondence:**

32 Yijie Jia

33 Department of Endocrinology & Metabolism, Nanfang Hospital, Southern Medical University,  
34 Guangzhou 510515, China. Tel: (86) 020-61641635, ORCID ID: 0000-0002-4338-8397, E-mail:  
35 yijie0207@126.com

36

37 Zongji Zheng

38 Department of Endocrinology & Metabolism, Nanfang Hospital, Southern Medical University,  
39 Guangzhou 510515, China. Tel.: (86) 020-61641635, ORCID ID: 0000-0003-0434-0152, E-mail:  
40 zhengzongji2014@163.com

41

42 **Email:**

43 Aomiao Chen: 2066181700@qq.com

NOTE: This preprint reports new research that has not been certified by peer review and should not be used to guide clinical practice.

44 Qiuyu He: 1311673203@qq.com  
45 Yichuan Wu: wuyichuan402@126.com  
46 Jiaqi Chen: m15626492040@163.com  
47 Xiaoqin Ma: mxqmxqcq@163.com  
48 Lingyuan Hu: 1951473860@qq.com  
49 Geningyue Wang: 2605436175@qq.com  
50 Zhuotong Wang: 1712880074@qq.com  
51 Yijie Jia: yijie0207@126.com  
52 Zongji Zheng: zhengzongji2014@163.com  
53

54 **Number of words: 3457**

55 **Number of references: 44**

56 **Number of tables: 2**

57 **Number of figures: 3**

58

59

60

61

62

63

64

65

66

67

68

69

70

71

72 **Association of quantified cardiovascular health with**  
73 **all-cause mortality in prediabetic patients**

74

75 **Abstract**

76 **Aim:** We aimed to explore the association between all-cause mortality and  
77 cardiovascular health (CVH) lifestyle interventions (as accurately quantified by Life's  
78 essential 8) in prediabetic patients and to observe the dose-response relationship of the  
79 potential association.

80 **Methods and Participants:** The retrospective study included 5344 participants with  
81 prediabetes (age: 52.9 ±15.8 years; (51.6% of men)). The Life's essential 8 (LE8)  
82 score includes four health indicators and four health behaviors. We calculated Cox  
83 proportional hazard ratios (HRS) for all-cause mortality in subgroups of high CVH  
84 ( $\geq 80$ ), low CVH ( $\leq 50$ ), and moderate CVH (50-79) based on the CVH quantification  
85 score of LE8, and explored the dose-response relationship of potential associations.  
86 We also performed separate analyses of the associations of all-cause mortality with  
87 each LE8 components and CVH health behaviors and indicators.

88 **Results:** In the median follow-up period of 8.33 years, 658 deaths occurred.  
89 Compared with participants with high CVH, the covariate-adjusted HR(95%CI) for  
90 participants with moderate and low CVH were 2.55(1.23-5.31) and 3.92 (1.70-9.02),  
91 respectively. There was a dose-response relationship between the improvement of

92 CVH status and the reduction of all-cause mortality (P-overall < 0.0001, P-nonlinear =  
93 0.7989). The improvement of CVH health behaviors has a more significant protective  
94 effect on patients with prediabetes than CVH health indicators.

95 **Conclusion:** High CVH status, quantified by LE8, has a significant effect on  
96 preventing mortality outcomes in prediabetic adults in the U.S.

97 **Keywords:** Prediabetes; Cardiovascular health; Life's Essential 8; All-cause mortality;  
98 Primary prevention.

99

## 100 **I. Background**

101 Prediabetes is defined as a glucose condition which is a high-risk metabolic state of  
102 diabetes<sup>1</sup>. It is estimated that by the year of 2030, 470 million people will suffer from  
103 prediabetes in the world<sup>2, 3</sup>, and more than 70% of prediabetic patients will eventually  
104 develop diabetes<sup>4</sup>. Moreover, prior guidelines and two meta-analyses involving more  
105 than one million people have shown that patients with prediabetes indeed encounter  
106 elevated risk for cardiovascular disease (CVD)<sup>2, 5, 6</sup>.

107 Previous guidelines and numerous large cohort studies have focused on identifying  
108 effective health interventions for diabetes, which are essential to reduce the medical  
109 burden and improve survival outcomes<sup>7-10</sup>. However, there is heterogeneity in the  
110 health status of individual patients' lifestyle that cannot be ignored<sup>11</sup>. Using an  
111 intervention-control design based on a single cutoff point, studies to determine the  
112 effectiveness of health interventions without accurate quantification of the health  
113 assessment process are likely to produce diametrically opposite results<sup>8, 12</sup>. This is  
114 most likely due to differences between the two studies in the setting of cut-off points

115 for health assessment (For example, the physical activity requirement for healthy  
116 young adults is an additional 280 minutes of moderate-intensity activity per week in  
117 the DQDPOS and 150 minutes per week in the DPPOS)<sup>9, 13</sup>. Therefore, we believe that  
118 quantified healthy living status based on uniform standards will be useful to confirm  
119 whether health interventions can preventatively reduce the risk of death in prediabetic  
120 patients. To further improve the global cardiovascular health (CVH), the AHA  
121 recently recommended the Life's Essential 8 (LE8) score to quantify cardiovascular  
122 health, which includes four CVH behaviors (diet, sleep, exercise, smoking cessation)  
123 and four ideal CVH indicators ( blood lipids, blood glucose, blood pressure, body  
124 mass index)<sup>14, 15</sup>. We believe that LE8 can achieve accurate quantification of CVH,  
125 which is beneficial to clarify whether health interventions in prediabetic patients can  
126 reduce the overall risk of death, and its intuitive score is important for urging the  
127 prediabetic population to achieve and maintain optimal CVH status<sup>16</sup>.

128 Based on its efficacy in health assessment, LE8 has been widely used in prevention  
129 and prognosis related studies<sup>17-20</sup>. However, to our knowledge, there are few study has  
130 investigated the association between LE8 and all-cause mortality in patients with  
131 T2DM<sup>21</sup>. We conclude that CVH intervention should be strengthened as early as  
132 possible in not only T2DM patients, but also pre-diabetic patients who are at risk of  
133 death and CVD. Especially in prediabetic patients, early health intervention can often  
134 achieve better results<sup>4</sup>. However, in medical practice, many prediabetic patients with  
135 CVD will be forced to change their lifestyle due to functional limitations or  
136 psychological reasons<sup>22-24</sup>. These patients will be more difficult to achieve a high CVH

137 state ( $LE8 \geq 80$ ) or even a moderate CVH state ( $LE8 \geq 50$ ) as defined by the AHA. In  
138 addition, because special factors are not considered by LE8 such as the obesity  
139 paradox may exist in the disease patient population<sup>25</sup>, it is important to analyze the  
140 relationship between the individual components of LE8 and mortality to clarify their  
141 efficacy. Finally, CVH behavioral intervention itself can improve CVH indicators and  
142 is more accessible in the components of LE8<sup>26</sup>. However, assessment of this  
143 component has not been implemented in prediabetic population.

144 Therefore, we studied a nationally representative queue, in order to realize the  
145 following three goals. First, we aimed to determine whether quantified high CVH  
146 status, based on LE8, could preventatively reduce the risk of all-cause mortality in  
147 prediabetic patients. Second, the dose-response form of this preventive effect will be  
148 confirmed, which will benefit prediabetic patients who can only achieve limited CVH  
149 improvement. Finally, we aimed to explore the associations of health behaviors,  
150 health indicators and individual components of LE8 with mortality risk in order to  
151 identify the most effective intervention strategies.

152

## 153 **II. Research Design and Methods**

### 154 **1. Study Design and Population**

155 The data and guidelines used in this analysis are freely available from  
156 NCHS:<https://www.cdc.gov/nchs/nhanes/index.htm>. The National Health and  
157 Nutrition Examination Survey (NHANES) is a nationally representative study which  
158 was designed to investigate the nutritional status and health in the United States.

159 Research design and methods has been described in detail  
160 ( [http://www.cdc.gov/nchs/nhanes/about\\_nhanes.htm](http://www.cdc.gov/nchs/nhanes/about_nhanes.htm). ) . The NHANES study  
161 protocol has been approved by the National Center for Health Statistics Institutional  
162 Review board, and each participant provided formal informed consent.  
163 Five NHANES cycles from 2007 to 2016 with 29201 adult participants was used as  
164 baseline. After excluding participants with insufficient data on diabetes-related  
165 biochemical markers (n = 16295), serum creatinine (n = 160), cardiovascular healthy  
166 lifestyle (n = 2333), and mortality follow-up (n = 5), weight data missing (n = 317),  
167 and 10091 participants were included in the analysis.

168 According to ADA's criteria and previous studies<sup>14, 27, 28</sup>, prediabetes was defined as a  
169 self-reported physician-diagnosed prediabetic state or an HbA1c level from 5.7% to  
170 6.4% or a fasting blood glucose level from 100mg/dL to 125mg/dL. Since this study  
171 targeted a prediabetic population, 5344 participants were included in this study after  
172 screening.

173

## 174 **2. Assessment of cardiovascular health**

175 Cardiovascular health (CVH) was assessed using the LE8 score<sup>22</sup>, which consists of :  
176 Physical activity, Diet health, nicotine exposure, BMI, Sleep health, Blood glucose,  
177 Blood lipid, Blood pressure. LE8 scores were calculated as the average of the eight  
178 component scores, ranging from 100 to 0 . According to recommendations from AHA,  
179 CVH status was classified according to the LE8 score: 80-100 as high CVH, 0-49 as  
180 low CVH, and 50-79 as moderate CVH .

181 Eight components were scored according to different metrics (Supplementary Table 1).  
182 The Healthy Eating Index 2020 (HEI-2020) was used to calculate the diet score<sup>29</sup>, and  
183 dietary information was obtained by self-reported food frequency questionnaire.  
184 Information on self-reported physical activity, nicotine exposure, and sleep duration  
185 was collected by NHANES questionnaire. Height, weight, and blood pressure were  
186 measured at the examination centers using standard instruments. Non-HDL  
187 cholesterol was used to calculate Lipid score. Blood glucose was scored by means of  
188 fasting plasma glucose or HbA1c measured by standard methods.

189

### 190 **3. Covariate assessment**

191 Covariates included demographic variables, health-related exposures, and underlying  
192 diseases. Demographic variables include years of age, gender, ethnicity, income and  
193 poverty rate. Health related exposure include drinking, smoking, BMI(kg/m<sup>2</sup>), total  
194 cholesterol. Basic diseases including diabetes, hypertension, cardiovascular disease  
195 (myocardial infarction, congestive heart failure, angina attack, or coronary heart  
196 disease, as diagnosed by a physician), and anemia.

197

### 198 **4. Mortality assessment**

199 Baseline data from the NHANES from 2007 through 2016 were linked to the National  
200 Death Index (NDI) through December 31, 2019, to determine survival.

201

### 202 **5. Statistical analysis**



203 All analyses accounted for the complex sampling design of the NHANES and used  
204 fasting subsample weights(wtsaf10yr) to ensure nationally representative results.  
205 CVH status was classified according to the LE8: 80-100 as high CVH, 0-49 as low  
206 CVH, and 50-79 as moderate CVH status<sup>15</sup>.  
207 First, Kaplan-Meier method was used to visually analyze the cumulative mortality of  
208 prediabetic patients with different CVH status categories. We then developed  
209 multivariable COX proportional hazards models to assess the association between  
210 CVH status and all-cause mortality based on follow-up time. The model passed  
211 Schoenfeld residual tests for statistical compliance (Supplementary Figure 1 ), and C  
212 statistics were calculated. We included demographic variables, health-related  
213 exposures, and basic diseases as covariates to adjust for confounding factors.  
214 Next, to analyze the dose-response relationship between all-cause mortality and the  
215 total CVH score LE8 in prediabetic patients, restricted cubic spline models (RCS) of 3  
216 sections (90th, 50th, and 10th percentiles) were applied. Models were evaluated  
217 according to Akaike information criterion (AIC) and tested for nonlinearity. To test  
218 the generalizability and sensitivity of this relationship, we repeated the RCS models,  
219 stratified according to age, sex, income and poverty ratio, and the presence or absence  
220 of cardiovascular disease or anemia. The second sensitivity analysis eliminates the  
221 survival time less than one year follow-up of adults, to evaluate whether the results  
222 under the influence of reverse causation. In the third sensitivity analysis, all  
223 participants with CVD were excluded, because the disease itself may force patients to  
224 make lifestyle changes, such as physical activity restrictions.

225 Finally, to investigate the best protective factors for patients with prediabetes, and to  
226 analyze the protective effect of health behaviors and health indicators, each LE8  
227 component score (grouped by whether it was 50 or higher) and the mean score on  
228 health behaviors and on health indicators were included as additional covariates in the  
229 COX proportional-hazards model. R software was used to perform all analyses  
230 (Version: R 4.2.1; <https://www.r-project.org/>). Double-sided P-values of less than 0.05  
231 were considered to indicate statistical significance.

232

### 233 **III. Results**

#### 234 **1. Baseline characteristics**

235 Table 1 describes the baseline characteristics of the total cohort of participants. Only  
236 7.0% of participants were classified as having high CVH. Prediabetic adults with  
237 better CVH status were more likely to be male, white people with higher family  
238 income level, do not drink alcohol or smoke, better control of blood lipids, blood  
239 glucose, and blood pressure, and do not have basic diseases.

240

#### 241 **2. Association between CVH status and mortality in patients with prediabetes**

242 During a median follow-up period of 8.33 years (95%CI, 8.25-8.50), 658 deaths  
243 occurred. As shown in Figure1, Kaplan-Meier survival curves differed by CVH status  
244 ( $P < 0.001$ , Log-rank). The survival curves of the high CVH group were significantly  
245 higher than those of the moderate and low CVH groups.

246

#### 247 **3. Association between CVH status and risk of mortality in patients with**

248 **prediabetes**

249 We developed multivariable COX proportional hazards models, as shown in Table 2,  
250 in which worsening CVH status leading to an increased risk of death. After adjusting  
251 for all potential covariates (Model 3, C-statistic: 0.8252166), the risk of death in the  
252 moderate CVH group and the low CVH group was respectively 2.55 times (HR: 2.55,  
253 95%CI: 1.23-5.31) and 3.92 times (HR:3.92, 95%CI:1.70-9.02) higher than that in the  
254 high CVH group.

255

256 **4.Dose-response relationship between CVH total score (Life's essential 8) and**  
257 **all-cause mortality in prediabetic patients**

258 RCS modeling and visualization were adopted to investigate the dose-response  
259 relationship in prediabetic patients. Multivariable adjusted RCS models showed a  
260 significant linear association between LE8 and all-cause mortality (P-overall < 0.0001,  
261 P-nonlinear = 0.7989, Figure 2a). Akaike information criterion evaluation showed that  
262 the model had good statistical power with AIC = 19.00. Through calculation, every 10  
263 points average increment, can avoid the risk for all-cause mortality in patients with up  
264 to 30%.

265 Stratified analyses showed that the LE8 score was linearly associated with all-cause  
266 mortality across all strata (Figure 2b through 2f). In addition, after eliminated all CVD  
267 patients, dose-response relationship between LE8 and all-cause mortality is still  
268 significant(P-overall < 0.0001, P-nonlinear = 0.8749, Supplementary Figure 2a). To  
269 avoid the effect of reverse causality, we also examined the association of LE8 with  
270 all-cause mortality in the subgroup of patients who had at least 1 year of follow-up,

271 and the results were generally consistent with those in the overall population  
272 (P-overall < 0.0001, P-nonlinear = 0.7198; Supplementary Figure 2b).

273

## 274 **5. Associations of individual components of CVH, health behaviors, and health**

275 indicators with all-cause mortality in patients with prediabetes

276 We included individual components of CVH status as covariates in the multivariable

277 COX regression model, and the results are shown in the forest plot (Figure 3a). We

278 found that among health behaviors, higher scores of sleep (HR: 0.76 , 95%CI:

279 0.62-0.92), exercise (HR: 0.49, 95%CI: 0.38-0.62) and smoking (HR: 0.73, 95%CI:

280 0.54-0.98) were associated with lower risk of all-cause mortality. However, no

281 significant association was found for Diet Score. In terms of health indicators, we

282 found that prediabetic patients with higher scores were at higher risk of all-cause

283 mortality, such as BMI Score (HR: 1.37, 95%CI: 1.13-1.66) and Bodylipid Score (HR:

284 1.21, 95%CI: 1.01-1.44) . Moreover, we noticed a protective association in the high

285 Glucose Score (HR: 0.63 , 95%CI: 0.49-0.80) but no significant association in the

286 Bloodpressure Score.

287 Because of the aforementioned heterogeneity in the associations between scores on

288 health behaviors and health indicators, we further explored the association between

289 mean scores on health behaviors and health indicators and all cause-mortality by

290 constructing a multivariate COX regression model (Figure 3b). Compared with

291 participants with high average scores of health behavior, participants with medium

292 and low average scores of health behavior had 1.93 times (HR: 1.93, 95%CI:

293 1.15-3.24) and 3.92 times (HR:3.06, 95%CI:1.89-4.98) risk of death, respectively.

294 However, the protective effect of higher mean scores on health indicators was no  
295 longer significant (Figure 3b).

296

#### 297 **IV. Discussion**

298 Based on a nationally representative sample from the NHANES, we found that high  
299 CVH status quantified by LE8, had a significant effect on preventing mortality  
300 outcomes in patients with prediabetes. In the linear dose-response relationship, the  
301 avoidable mortality risk in prediabetic patients reached 30% for every 10-point LE8  
302 increment on average. Improving CVH health behaviors has a more significant  
303 protective effect on prediabetic patients than CVH health indicators. Due to the strong  
304 accessibility of health behavior assessment in patients' daily life, the CVH status  
305 based on LE8 may reduce the risk of death and improve their quality of life.

306 There has been controversy in previous large cohort studies about whether lifestyle  
307 interventions are effective in reducing the all-cause mortality in diabetic patients. We  
308 applied a uniform CVH quantification criterion based on LE8 and showed that high  
309 CVH status was significantly associated with reduced all-cause mortality in  
310 prediabetic patients. Effective health interventions are important for improving the  
311 survival prognosis and reducing the medical burden of prediabetes, the results of the  
312 Da Qing Diabetes Prevention Outcomes Study (DQDPOS) support our view.

313 Previous studies have shown that quantified CVH has a protective effect on diabetes  
314 incidence, quality of life and mortality<sup>20, 30-33</sup>. In a follow-up cohort of 309,789  
315 participants, Sun et al. found that higher CVH status was associated with reduced  
316 premature mortality among T2DM patients (HR=0.42,95%CI=0.39-0.45)<sup>21</sup>. Based on

317 the guidelines from American Association of Clinical Endocrinology and considering  
318 the value of early life interventions, we further studied patients with prediabetes and  
319 found a significant protective effect. In a meta-analysis of 193,126 participants, Geidl  
320 et al. found that a 1-point improvement in CVH status based on the LS7 score was  
321 associated with an average 11% reduction in all-cause mortality  
322 (RR=0.89,95%CI=0.86-0.93) observing significant dose-response characteristics<sup>34</sup>.  
323 However, LS7 quantifies CVH by simply adding categorical scores of seven factors,  
324 which may result in insufficient statistical power for dose-response associations<sup>20</sup>.  
325 Therefore, we used LE8 from the mean score of the hundred-mark scale for the eight  
326 health factors for the analysis and found significant dose-response associations  
327 (P-overall < 0.0001, P-nonlinear = 0.7989). Every 10-point improvement in LE8 score  
328 was associated with a 30% reduction in prediabetic patients' all-cause mortality,  
329 which means that even a slight improvement in CVH status may have a significant  
330 effect on the prevention of mortality in prediabetic patients. Given the accessibility of  
331 the various assessments of the LE8 in the daily life of patients, we focused on the  
332 health behavior part of CVH. The results showed that health behaviors could have  
333 more significant improvement on the survival prognosis of patients. However, after  
334 adjustments, the health indicator scores have no significant protective effect, which  
335 may be due to a more fundamental effect of health behaviors. Our results may suggest  
336 that physicians should strengthen health behavior education for patients with  
337 prediabetes. Marteau et al. highlighted that promoting diet, physical activity and other  
338 behaviors into the healthiest state, remains a major challenge for cardiometabolic

339 disease prevention efforts, which further supports our view<sup>35</sup>.

340 Among CVH health behaviors, we noticed that increased physical activity was the top  
341 protective factor in reducing the risk of all-cause mortality. The protective association  
342 of physical activity has been widely demonstrated<sup>30</sup>, and our analysis validates the  
343 recent scoring method of physical activity in LE8 in the prediabetic population. We  
344 also suggest that nicotine exposure was the second most significant contributor to  
345 prediabetic patient's mortality. Cohort study data show that smoking cessation is  
346 associated with reduced risk for all-cause mortality<sup>36</sup>. Our findings confirmed this  
347 association and emphasize the protective significance of long-term maintenance of  
348 smoking cessation status in prediabetic patients with a history of smoking, based on  
349 the LE8-based scoring method for the duration of smoking cessation. Previous  
350 evidence has shown that unhealthy sleep duration (<7 or >8 hours) is associated with  
351 increased all-cause mortality<sup>37</sup>. Our results showed that the risk of all-cause mortality  
352 decreased significantly with the increase of sleep index score.

353 Interestingly, a significant positive association was shown between BMI score and  
354 blood lipid score greater than 50 and all-cause mortality in prediabetic patients. This  
355 may be related to the obesity paradox effect, where obesity appears as a risk factor in  
356 disease incidence but has a protective effect in patients with severe disease<sup>25, 40-42</sup>.

357 Similarly, in a meta-analysis of 161,984 participants, Liu et al. observed the protective  
358 effect of overweight in patients with type 2 diabetes<sup>43</sup>. However, an opposite result  
359 was observed in a follow-up study with an average of 15.8 years, and Tobias et al.  
360 suggested that the obesity paradox was due to insufficient follow-up time<sup>44</sup>. Our

361 findings may provide new evidence in this controversial area, and further studies are  
362 needed to confirm possible interactions in the prediabetic population. Our results  
363 noticed that the relationship between dietary health score  $\geq 50$  and all-cause  
364 mortality was not significant. Because there were few participants with a score of 80  
365 or higher in each category, we used a cutoff of 50 or higher to improve statistical  
366 power. This cutoff may not have met the health requirements for improved outcomes  
367 in patients with prediabetes, given that diet quality is a major determinant of the risk  
368 of diabetes<sup>38, 39</sup>. In a cohort study, also based on a US population, Fretts et al. observed  
369 a similar phenomenon<sup>33</sup>. A similar reason may explain the nonsignificant results for  
370 blood-pressure scores.

371 To the best of our knowledge, this is the first study to examine the association  
372 between quantified CVH and all-cause mortality in prediabetic patients. The strength  
373 of this study is that it considers both the need to prevent prediabetes and the need to  
374 mitigate the impact of CVD comorbidities on prediabetic patients. In addition, we  
375 designed the study with a relatively large sample size and long-term follow-up, used  
376 the new LE8 score recommended by the AHA to accurately quantify CVH status, and  
377 performed covariate adjustment and sensitivity analysis during the data analysis,  
378 which makes our results more reliable.

379 However, there are still several potential limitations worth considering. First, this  
380 study was an observational cohort study, so causality should be interpreted with  
381 caution. Secondly, the four CVH health behaviors (diet, physical activity, nicotine  
382 exposure, and sleep) in the LE8 score were all self-reported, which may lead to recall



383 bias. More objective monitoring would be beneficial to improve the accuracy of these  
384 four health behaviors. Third, we obtained the CVH score only once at baseline, which  
385 may change during long-term follow-up. Finally, our study population included only  
386 U.S. adults, and generalization of the results to other populations should be cautious.

387

## 388 **V. Conclusion**

389 We suggest that a high CVH status based on LE8 quantification, especially CVH  
390 health behaviors in prediabetic adults has a significant effect in preventing mortality  
391 outcomes in prediabetic adults. There was a linear dose-response association between  
392 increased LE8 and reduced all-cause mortality. Our findings highlight the importance  
393 of focusing on CVH improvement in prediabetic patients, especially on more  
394 accessible health behaviors, as even small improvements can yield substantial  
395 reductions in the risk of all-cause mortality.

396

## 397 **Acknowledgement**

398 This research has been conducted using the NHANES resources. We are grateful to  
399 the participants and staff of the NHANES for their valuable contributions.

400

## 401 **Funding**

402 This work was supported by research grants from the National Natural Science  
403 Foundation of China (Y.J., 82370818, Z.Z., 82270862); Natural Science Foundation  
404 of Guangdong Province(Y.J.,2024A1515012744); the Guangzhou Science and  
405 Technology Project (Y.J.,2024A04J5098); and the National Undergraduate Training

406 Program for Innovation and Entrepreneurship, Southern Medical University (Z.Z.,  
407 202312121031, Y.J., S202312121167).

408

### 409 **Author contributions**

410 A.C., Q.H., Y.W., Z.Z., and Y.J. designed this study, A.C., Y.W. and Q.H. performed  
411 the data extraction and statistical analysis. Y.W., Q.H., J.C., X.M., L.H., G.W., and  
412 Z.W. validated the statistical analysis. A.C. and Q.H. wrote the original draft of the  
413 manuscript, which was revised by Y.W., Z.Z., and Y.J. All authors made great  
414 contributions to the manuscript and approved it for submission. Z.Z. and Y.J. are the  
415 guarantors of this work and, as much, had full access to all the data in the study and  
416 take responsibility for the integrity of the data and accuracy of the data analysis.

417

### 418 **Conflict of interest**

419 All authors declare no competing interests.

420

## 421 **References:**

- 422 1. Tabák AG, Herder C, Rathmann W, Brunner EJ, Kivimäki M. Prediabetes: a high-risk state for  
423 diabetes development. *The Lancet*. 2012;379(9833):2279-2290.
- 424 2. Cai X, Zhang Y, Li M, Wu JH, Mai L, Li J, Yang Y, Hu Y, Huang Y. Association between  
425 prediabetes and risk of all cause mortality and cardiovascular disease: updated meta-analysis. *BMJ*.  
426 2020;m2297.
- 427 3. Kim SH. Reframing prediabetes: A call for better risk stratification and intervention. *J INTERN*  
428 *MED*. 2024;295(6):735-747.
- 429 4. 3. Prevention or Delay of Type 2 Diabetes:Standards of Medical Care in Diabetes — 2020.  
430 *DIABETES CARE*. 2020;43(Supplement\_1):S32-S36.
- 431 5. Cosentino F, Grant PJ, Aboyans V, Bailey CJ, Ceriello A, Delgado V, Federici M, Filippatos G,  
432 Grobbee DE, Hansen TB, Huikuri HV, Johansson I, Jüni P, Lettino M, Marx N, Mellbin LG, Östgren  
433 CJ, Rocca B, Roffi M, Sattar N, Seferović PM, Sousa-Uva M, Valensi P, Wheeler DC, Piepoli MF,  
434 Birkeland KI, Adamopoulos S, Ajjan R, Avogaro A, Baigent C, Brodmann M, Bueno H, Ceconi C,

- 435 Chioncel O, Coats A, Collet J, Collins P, Cosyns B, Di Mario C, Fisher M, Fitzsimons D, Halvorsen S,  
436 Hansen D, Hoes A, Holt RIG, Home P, Katus HA, Khunti K, Komajda M, Lambrinou E, Landmesser U,  
437 Lewis BS, Linde C, Lorusso R, Mach F, Mueller C, Neumann F, Persson F, Petersen SE, Petronio AS,  
438 Richter DJ, Rosano GMC, Rossing P, Rydén L, Shlyakhto E, Simpson IA, Touyz RM, Wijns W,  
439 Wilhelm M, Williams B, Aboyans V, Bailey CJ, Ceriello A, Delgado V, Federici M, Filippatos G,  
440 Grobbee DE, Hansen TB, Huikuri HV, Johansson I, Jüni P, Lettino M, Marx N, Mellbin LG, Östgren  
441 CJ, Rocca B, Roffi M, Sattar N, Seferović PM, Sousa-Uva M, Valensi P, Wheeler DC, Windecker S,  
442 Aboyans V, Baigent C, Collet J, Dean V, Delgado V, Fitzsimons D, Gale CP, Grobbee DE, Halvorsen S,  
443 Hindricks G, Iung B, Jüni P, Katus HA, Landmesser U, Leclercq C, Lettino M, Lewis BS, Merkely B,  
444 Mueller C, Petersen SE, Petronio AS, Richter DJ, Roffi M, Shlyakhto E, Simpson IA, Sousa-Uva M,  
445 Touyz RM, Zelveian PH, Scherr D, Jahangirov T, Lazareva I, Shivalkar B, Naser N, Gruev I, Milicic D,  
446 Petrou PM, Linhart A, Hildebrandt P, Hasan-Ali H, Marandi T, Lehto S, Mansourati J, Kurashvili R,  
447 Siasos G, Lengyel C, Thrainsdottir IS, Aronson D, Di Lenarda A, Raissova A, Ibrahim P, Abilova S,  
448 Trusinskis K, Saade G, Benlamin H, Petrulioniene Z, Banu C, Magri CJ, David L, Boskovic A, Alami  
449 M, Liem AH, Bosevski M, Svingen GFT, Janion M, Gavina C, Vinereanu D, Nedogoda S, Mancini T,  
450 Ilic MD, Fabryova L, Fras Z, Jiménez-Navarro MF, Norhammar A, Lehmann R, Mourali MS, Ural D,  
451 Nesukay E, Chowdhury TA. 2019 ESC Guidelines on diabetes, pre-diabetes, and cardiovascular  
452 diseases developed in collaboration with the EASD. *EUR HEART J*. 2020;41(2):255-323.
- 453 **6.** Huang Y, Cai X, Mai W, Li M, Hu Y. Association between prediabetes and risk of cardiovascular  
454 disease and all cause mortality: systematic review and meta-analysis. *BMJ*. 2016;i5953.
- 455 **7.** Diagnosis and classification of diabetes mellitus. *DIABETES CARE*. 2014;37 Suppl 1:S81-S90.
- 456 **8.** Gong Q, Zhang P, Wang J, Ma J, An Y, Chen Y, Zhang B, Feng X, Li H, Chen X, Cheng YJ,  
457 Gregg EW, Hu Y, Bennett PH, Li G, Qian X, Zhang L, Hui Y, He S, Wang X, Thompson TJ, Gerzoff  
458 RB, Liu P, Jiang Y, Hu Z, Wang J, Jiang X, Zhang J, Xi R, Pang C, Li C, Hu X, Yang W, An Z, Sun X,  
459 Chen C, Gang Y, Liu J, Xiao J, Cao H, Zheng H, Zhang H, Li H, Hong J, Liu X, Zhao F, Wang W,  
460 Chen B, Howard BV, Engelgau MM, Roglic G. Morbidity and mortality after lifestyle intervention for  
461 people with impaired glucose tolerance: 30-year results of the Da Qing Diabetes Prevention Outcome  
462 Study. *The Lancet Diabetes & Endocrinology*. 2019;7(6):452-461.
- 463 **9.** Lee CG, Heckman-Stoddard B, Dabelea D, Gadde KM, Ehrmann D, Ford L, Prorok P, Boyko EJ,  
464 Pi-Sunyer X, Wallia A, Knowler WC, Crandall JP, Temprosa M. Effect of Metformin and Lifestyle  
465 Interventions on Mortality in the Diabetes Prevention Program and Diabetes Prevention Program  
466 Outcomes Study. *DIABETES CARE*. 2021;44(12):2775-2782.
- 467 **10.** Effects of Intensive Lifestyle Intervention on All-Cause Mortality in Older Adults With Type 2  
468 Diabetes and Overweight/Obesity: Results From the Look AHEAD Study. *DIABETES CARE*.  
469 2022;45(5):1252-1259.
- 470 **11.** Zhang Y, Pan X, Lu Q, Wang Y, Geng T, Zhou Y, Liao LM, Tu Z, Chen J, Xia P, Wang Y, Wan Z,  
471 Guo K, Yang K, Yang H, Chen S, Wang G, Han X, Wang Y, Yu D, He M, Zhang X, Liu L, Wu T, Wu S,  
472 Liu G, Pan A. Association of Combined Healthy Lifestyles With Cardiovascular Disease and Mortality  
473 of Patients With Diabetes: An International Multicohort Study. *MAYO CLIN PROC*. 2023;98(1):60-74.
- 474 **12.** Effect of Metformin and Lifestyle Interventions on Mortality in the Diabetes Prevention Program  
475 and Diabetes Prevention Program Outcomes Study.
- 476 **13.** Pan XR, Li GW, Hu YH, Wang JX, Yang WY, An ZX, Hu ZX, Lin J, Xiao JZ, Cao HB, Liu PA,  
477 Jiang XG, Jiang YY, Wang JP, Zheng H, Zhang H, Bennett PH, Howard BV. Effects of diet and  
478 exercise in preventing NIDDM in people with impaired glucose tolerance. The Da Qing IGT and

- 479 Diabetes Study. *DIABETES CARE*. 1997;20(4):537-544.
- 480 **14.** He Y, Wang Z, Zhang H, Lai X, Liu M, Yang L, Zheng Y, He M, Kong W, Zhang X. Polygenic  
481 Risk Score Modifies the Association of HbA1c With Hearing Loss in Middle-Aged and Older  
482 Chinese: The Dongfeng-Tongji Cohort. *DIABETES CARE*. 2024.
- 483 **15.** Lloyd-Jones DM, Allen NB, Anderson CAM, Black T, Brewer LC, Foraker RE, Grandner MA,  
484 Lavretsky H, Perak AM, Sharma G, Rosamond W. Life's Essential 8: Updating and Enhancing the  
485 American Heart Association's Construct of Cardiovascular Health: A Presidential Advisory From the  
486 American Heart Association. *CIRCULATION*. 2022;146(5).
- 487 **16.** Tang R, Wang X, Li X, Ma H, Liang Z, Heianza Y, Qi L. Adherence to Life's Essential 8 and  
488 incident chronic kidney disease: a prospective study of 147,988 UK Biobank participants. *The*  
489 *American Journal of Clinical Nutrition*. 2023;118(4):804-811.
- 490 **17.** Kulkarni AV, Anders M, Nazal L, Ridruejo E, Efe C. Cases of severe acute liver injury following  
491 inactivated SARS-CoV-2 vaccination. *J HEPATOL*. 2023;78(2):e60-e61.
- 492 **18.** Wu S, Wu Z, Yu D, Chen S, Wang A, Wang A, Gao X. Life's Essential 8 and Risk of Stroke: A  
493 Prospective Community-Based Study. *STROKE*. 2023;54(9):2369-2379.
- 494 **19.** Janssen I, Powell LH, Dugan SA, Derby CA, Kravitz HM. Cardiovascular Health, Race, and  
495 Decline in Cognitive Function in Midlife Women: The Study of Women's Health Across the Nation. *J*  
496 *AM HEART ASSOC*. 2024;13(9).
- 497 **20.** Sun J, Li Y, Zhao M, Yu X, Zhang C, Magnussen CG, Xi B. Association of the American Heart  
498 Association's new "Life's Essential 8" with all-cause and cardiovascular disease-specific mortality:  
499 prospective cohort study. *BMC MED*. 2023;21(1).
- 500 **21.** Sun Y, Yu Y, Zhang K, Yu B, Yu Y, Wang Y, Wang B, Tan X, Wang Y, Lu Y, Wang N. Association  
501 between Life's Essential 8 score and risk of premature mortality in people with and without type 2  
502 diabetes: A prospective cohort study. *Diabetes/Metabolism Research and Reviews*. 2023;39(5).
- 503 **22.** Lloyd-Jones DM, Ning H, Labarthe D, Brewer L, Sharma G, Rosamond W, Foraker RE, Black T,  
504 Grandner MA, Allen NB, Anderson C, Lavretsky H, Perak AM. Status of Cardiovascular Health in US  
505 Adults and Children Using the American Heart Association's New "Life's Essential 8" Metrics:  
506 Prevalence Estimates From the National Health and Nutrition Examination Survey (NHANES), 2013  
507 Through 2018. *CIRCULATION*. 2022;146(11):822-835.
- 508 **23.** Boyer TM, Avula V, Minhas AS, Vaught AJ, Sharma G, Gemmill A. Psychosocial Stressors as a  
509 Determinant of Maternal Cardiovascular Health During Pregnancy. *The American Journal of*  
510 *Cardiology*. 2023;201:302-307.
- 511 **24.** Zhang H, Zhang L, Li J, Xiang H, Liu Y, Gao C, Sun X. The influence of Life's Essential 8 on the  
512 link between socioeconomic status and depression in adults: a mediation analysis. *BMC PSYCHIATRY*.  
513 2024;24(1).
- 514 **25.** Zheng J, Hu Y, Xu H, Lei Y, Zhang J, Zheng Q, Li L, Tu W, Chen R, Guo Q, Zang X, You Q, Xu  
515 Z, Zhou Q, Wu X. Normal-weight visceral obesity promotes a higher 10-year atherosclerotic  
516 cardiovascular disease risk in patients with type 2 diabetes mellitus - a multicenter study in China.  
517 *CARDIOVASC DIABETOL*. 2023;22(1).
- 518 **26.** Ueno K, Kaneko H, Okada A, Suzuki Y, Matsuoka S, Fujiu K, Michihata N, Jo T, Takeda N,  
519 Morita H, Kamiya K, Ako J, Node K, Yasunaga H, Komuro I. Association of four health behaviors in  
520 Life's Essential 8 with the incidence of hypertension and diabetes mellitus. *PREV MED*.  
521 2023;175:107685.
- 522 **27.** Zhang Q, Xiao S, Jiao X, Shen Y. The triglyceride-glucose index is a predictor for cardiovascular

- 523 and all-cause mortality in CVD patients with diabetes or pre-diabetes: evidence from NHANES 2001 –  
524 2018. *CARDIOVASC DIABETOL*. 2023;22(1).
- 525 **28.** Zou X, Zhou X, Zhu Z, Ji L. Novel subgroups of patients with adult-onset diabetes in Chinese and  
526 US populations. *Lancet Diabetes Endocrinol*. 2019;7(1):9-11.
- 527 **29.** Shams-White MM, Pannucci TE, Lerman JL, Herrick KA, Zimmer M, Meyers MK, Stody EE,  
528 Reedy J. Healthy Eating Index-2020: Review and Update Process to Reflect the Dietary Guidelines  
529 for Americans,2020-2025. *JACAD NUTR DIET*. 2023;123(9):1280-1288.
- 530 **30.** Yang Q, Cogswell ME, Flanders WD, Hong Y, Zhang Z, Loustalot F, Gillespie C, Merritt R, Hu  
531 FB. Trends in Cardiovascular Health Metrics and Associations With All-Cause and CVD Mortality  
532 Among US Adults. *JAMA*. 2012;307(12):1273.
- 533 **31.** Perak AM, Ning H, Khan SS, Bundy JD, Allen NB, Lewis CE, Jacobs DR, Van Horn LV,  
534 Lloyd-Jones DM. Associations of Late Adolescent or Young Adult Cardiovascular Health With  
535 Premature Cardiovascular Disease and Mortality. *JAM COLL CARDIOL*. 2020;76(23):2695-2707.
- 536 **32.** Xanthakis V, Enserro DM, Murabito JM, Polak JF, Wollert KC, Januzzi JL, Wang TJ, Toftler G,  
537 Vasani RS. Ideal Cardiovascular Health. *CIRCULATION*. 2014;130(19):1676-1683.
- 538 **33.** FRETTS AM, HOWARD BV, MCKNIGHT B, DUNCAN GE, BERESFORD SAA, METE M,  
539 ZHANG Y, SISCOVICK DS. Life's Simple 7 and Incidence of Diabetes Among American Indians: The  
540 Strong Heart Family Study. *DIABETES CARE*. 2014;37(8):2240-2245.
- 541 **34.** Geidl W, Schlesinger S, Mino E, Miranda L, Pfeifer K. Dose – response relationship between  
542 physical activity and mortality in adults with noncommunicable diseases: a systematic review and  
543 meta-analysis of prospective observational studies. *INT J BEHAV NUTR PHY*. 2020;17(1).
- 544 **35.** Marteau TM, Hollands GJ, Fletcher PC. Changing Human Behavior to Prevent Disease: The  
545 Importance of Targeting Automatic Processes. *SCIENCE*. 2012;337(6101):1492-1495.
- 546 **36.** Han L, You D, Ma W, Astell-Burt T, Feng X, Duan S, Qi L. National Trends in American Heart  
547 Association Revised Life's Simple 7 Metrics Associated With Risk of Mortality Among US Adults.  
548 *JAMA Network Open*. 2019;2(10):e1913131.
- 549 **37.** Krittanawong C, Tunhasiriwet A, Wang Z, Zhang H, Farrell AM, Chirapongsathorn S, Sun T,  
550 Kitai T, Argulian E. Association between short and long sleep durations and cardiovascular outcomes: a  
551 systematic review and meta-analysis. *European Heart Journal: Acute Cardiovascular Care*.  
552 2019;8(8):762-770.
- 553 **38.** Schwingshackl L, Hoffmann G, Lampousi A, Knüppel S, Iqbal K, Schwedhelm C, Bechthold A,  
554 Schlesinger S, Boeing H. Food groups and risk of type 2 diabetes mellitus: a systematic review and  
555 meta-analysis of prospective studies. *EUR J EPIDEMIOL*. 2017;32(5):363-375.
- 556 **39.** Wang B, Fu Y, Tan X, Wang N, Qi L, Lu Y. Assessing the impact of type 2 diabetes on mortality  
557 and life expectancy according to the number of risk factor targets achieved: an observational study.  
558 *BMC MED*. 2024;22(1).
- 559 **40.** Ottosson F, Smith E, Ericson U, Brunkwall L, Orho-Melander M, Di Somma S, Antonini P,  
560 Nilsson PM, Fernandez C, Melander O. Metabolome-Defined Obesity and the Risk of Future Type 2  
561 Diabetes and Mortality. *DIABETES CARE*. 2022;45(5):1260-1267.
- 562 **41.** Al-Chalabi S, Chinnadurai R, Kalra PA, Sinha S. Mortality and Renal Outcomes Are Impacted by  
563 Obesity in Cardiorenal Metabolic Disease but Not in People with Concomitant Diabetes Mellitus.  
564 *CARDIORENAL MED*. 2024;14(1):23-33.
- 565 **42.** Nie W, Zhang Y, Jee SH, Jung KJ, Li B, Xiu Q. Obesity survival paradox in pneumonia: a  
566 meta-analysis. *BMC MED*. 2014;12:61.

- 567 43. Liu X, Liu Y, Zhan J, He Q. Overweight, obesity and risk of all-cause and cardiovascular  
568 mortality in patients with type 2 diabetes mellitus: a dose - response meta-analysis of prospective  
569 cohort studies. *EUR J EPIDEMIOL*. 2015;30(1):35-45.
- 570 44. Tobias DK, Pan A, Jackson CL, O'Reilly EJ, Ding EL, Willett WC, Manson JE, Hu FB.  
571 Body-Mass Index and Mortality among Adults with Incident Type 2 Diabetes. *NEW ENGL J MED*.  
572 2014;370(3):233-244.

573

574

### 575 **Figure legends**

576 Figure 1 Association of different CVH status and cumulative mortality in prediabetic patients.

577 Figure 2 Dose-response relationship between the total CVH score of Life's essential 8 and  
578 all-cause mortality in patients with prediabetes. Panel b-f: Stratified analysis was performed  
579 according to age group (greater than 60 years old or not), gender group (male or female), income  
580 to poverty rate (higher than the study population median 2.06 or not), and whether there was  
581 cardiovascular disease (defined as any one of myocardial infarction, congestive heart failure,  
582 angina attack, or coronary heart disease, as diagnosed by a physician) and anemia(defined as  
583 hemoglobin < 12mg/dL in men and < 11mg/dL in women).

584 Figure 3 Association of individual CVH component scores, health behaviors or indicators and  
585 all-cause mortality in patients with prediabetes. Panel a-association of individual CVH  
586 component scores and all-cause mortality in patients with prediabetes (high for  $\geq 50$  points,  
587 otherwise low). Panel b-association of mean score of health behaviors or indicators and all-cause  
588 mortality in patients with prediabetes. Covariates included age (greater than 60 years old or not),  
589 gender (male or female), ethnicity (black, white, or other people), income and poverty rate (higher  
590 than the study population median 2.06 or not), cardiovascular disease (defined as any one of  
591 myocardial infarction, congestive heart failure, angina attack, or coronary heart disease, as  
592 diagnosed by a physician), and anemia (defined as hemoglobin < 12mg/dL in men and < 11mg/dL  
593 in women). ALQ110: at least 12 cups of alcohol in a life time. CVD: cardiovascular disease.

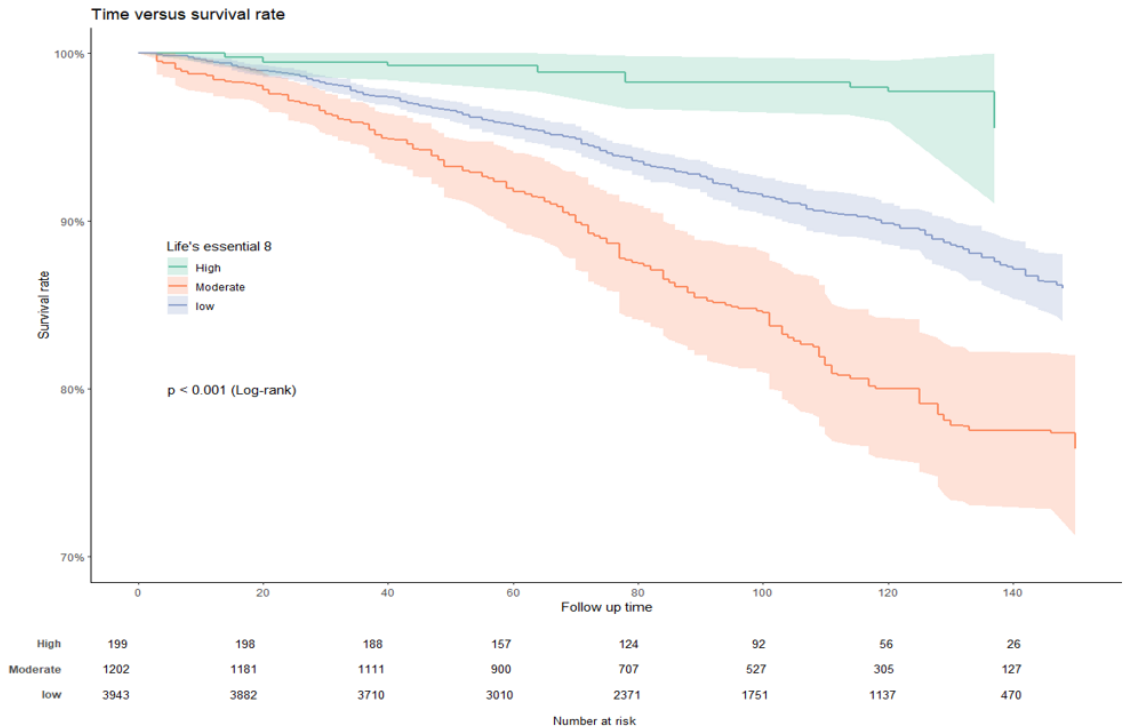

**Figure 1 Association of different CVH status and cumulative mortality in prediabetic patients.**

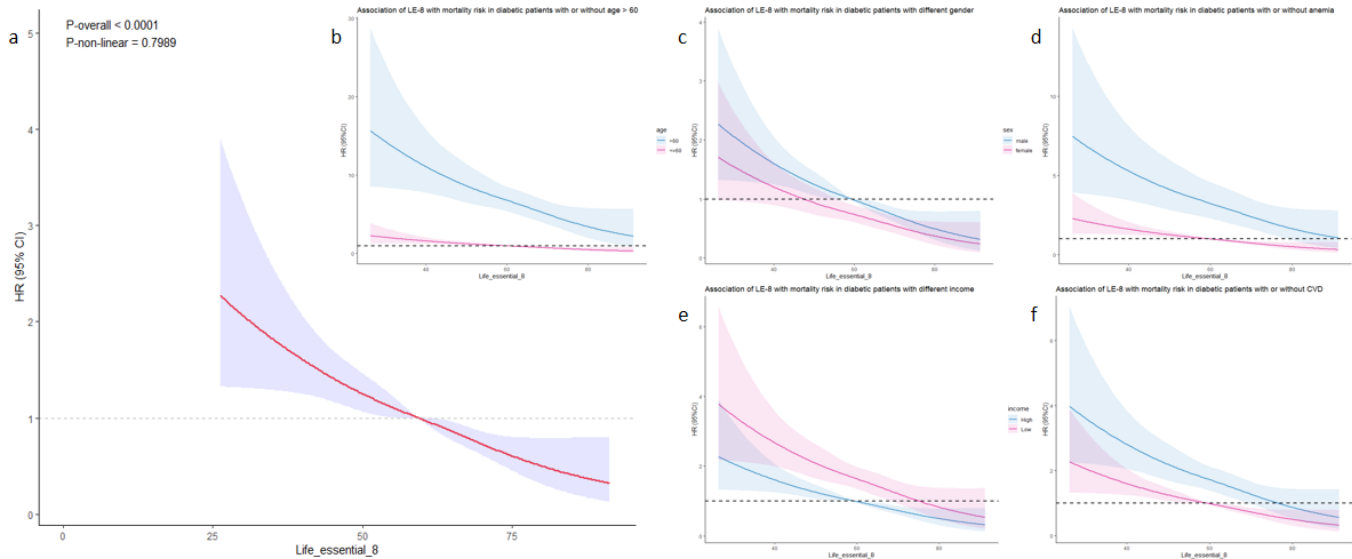

**Figure 2 Dose-response relationship between the total CVH score of Life's essential 8 and all-cause mortality in patients with prediabetes.** Panel b-f: Stratified analysis was performed according to age group (greater than 60 years old or not), gender group (male or female), income to poverty rate (higher than the study population median 2.06 or not), and whether there was cardiovascular disease (defined as any one of myocardial infarction, congestive heart failure, angina attack, or coronary heart disease, as diagnosed by a physician) and anemia (defined as hemoglobin < 12mg/dL in men and < 11mg/dL in women).



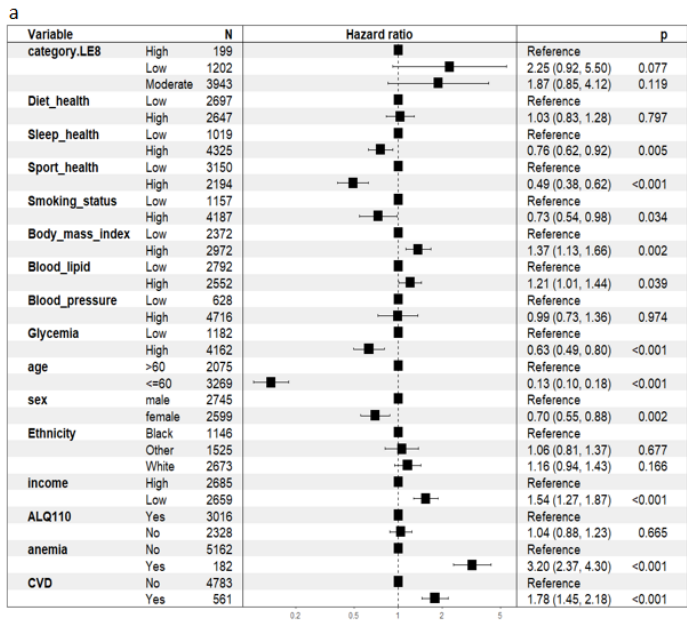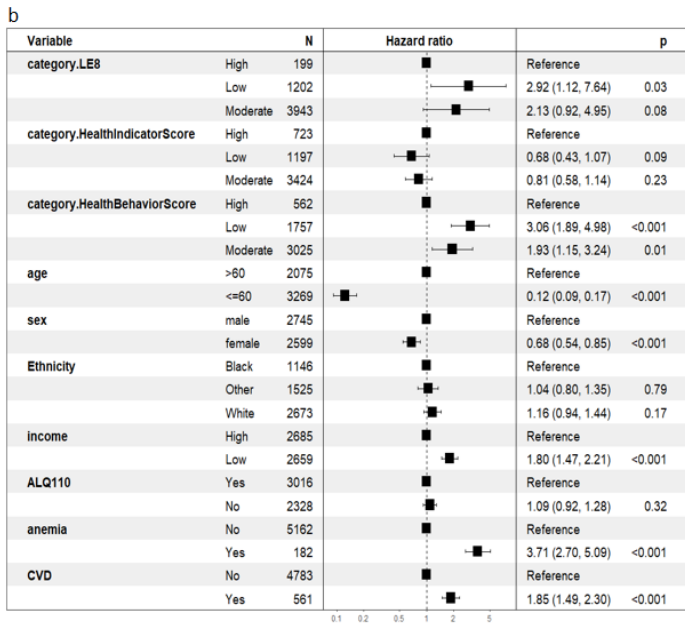

**Figure 3 Association of individual CVH component scores, health behaviors or indicators and all-cause mortality in patients with prediabetes.** Panel a-association of individual CVH component scores and all-cause mortality in patients with prediabetes (high for  $\geq 50$  points, otherwise low). Panel b-association of mean score of health behaviors or indicators and all-cause mortality in patients with prediabetes. Covariates included age (greater than 60 years old or not), gender (male or female), ethnicity (black, white, or other people), income and poverty rate (higher than the study population median 2.06 or not), cardiovascular disease (defined as any one of myocardial infarction, congestive heart failure, angina attack, or coronary heart disease, as diagnosed by a physician), and anemia (defined as hemoglobin  $< 12\text{mg/dL}$  in men and  $< 11\text{mg/dL}$  in women). ALQ110: at least 12 cups of alcohol in a life time. CVD: cardiovascular disease.

**Table 1-Baseline characteristics of the weighted study population classified by CVH status**

| Characteristics              | Overall               | CVH status (LE8 score) |                       |                      | p      |
|------------------------------|-----------------------|------------------------|-----------------------|----------------------|--------|
|                              |                       | High(80-100)           | Moderate(50-79)       | Low(0-49)            |        |
| <b>Weighted N</b>            | 226 million           | 7.0 (15.8 million)     | 76.7 (173.3 million)  | 13.6 (36.9 million)  |        |
| <b>Age , years</b>           | 52.86 (15.87)         | 44.73 (17.38)          | 53.24 (15.93)         | 54.58 (13.75)        | <0.001 |
| <b>Sex</b>                   |                       |                        |                       |                      | 0.008  |
| Male                         | 51.6 (116.6 million ) | 57.4 (9.1 million )    | 52.3 (90.7 million )  | 45.7 (16.8 million ) |        |
| Female                       | 48.4 (109.4 million ) | 42.6 (6.7 million )    | 47.7 (82.6 million )  | 54.3 (20 million )   |        |
| <b>Ethnicity</b>             |                       |                        |                       |                      | 0.01   |
| Black                        | 15.1 (34 million )    | 11.0 (1.7 million )    | 14.7 (25.5 million )  | 18.3 (6.8 million )  |        |
| Other                        | 20.2 (45.6 million )  | 25.7 (4.1 million )    | 20.1 (34.9 million )  | 18.1 (6.7 million )  |        |
| White                        | 64.7 (146.3 million ) | 63.3 (10 million )     | 65.1 (112.9 million ) | 63.6 (23.4 million ) |        |
| <b>PIR*</b>                  | 2.97(1.64)            | 3.30(1.59 )            | 3.05(1.63)            | 2.34(1.58)           | <0.001 |
| <b>Drinker*</b>              | 59.4 (134.3 million ) | 53.6 (8.5 million )    | 59.0 (102.3 million ) | 63.9 (23.6 million ) | 0.049  |
| <b>Smoker*</b>               | 48.6 (109.7 million ) | 21.7 (3.4 million )    | 45.3 (78.5 million )  | 75.4 (27.8 million ) | <0.001 |
| <b>BMI</b>                   | 30.14 (6.83)          | 24.80 (3.75)           | 29.72 (6.37)          | 34.40 (7.63)         | <0.001 |
| <b>Sleep duration, hours</b> | 6.77 (1.66)           | 7.20 (0.91)            | 6.82 (1.21)           | 6.35 (3.06)          | <0.001 |
| <b>Creatinine, mmol/L</b>    | 0.89 (0.38)           | 0.87 (0.19)            | 0.90 (0.41)           | 0.87 (0.26)          | 0.151  |
| <b>Glucose, mmol/L</b>       | 102.19 (20.34)        | 95.73 (10.04)          | 101.58 (18.67)        | 107.81 (28.36)       | <0.001 |
| <b>TC, mmol/L</b>            | 196.91 (41.58)        | 175.14 (29.26)         | 194.84 (40.58)        | 216.00 (43.65)       | <0.001 |
| <b>SBP,mmHg</b>              | 124.06 (17.00)        | 114.90 (12.86)         | 123.56 (16.29)        | 130.34 (19.41)       | <0.001 |
| <b>DBP,mmHg</b>              | 69.95 (12.56)         | 67.58 (8.87)           | 69.57 (12.37)         | 72.73 (14.26)        | <0.001 |
| <b>CVD</b>                   | 9.3 (21 million )     | 7.2 (1.1 million )     | 8.7 (15.1 million )   | 13.0 (4.8 million )  | 0.006  |
| <b>Diabetes</b>              | 17.8 (40.3 million )  | 0.7 (0.1 million )     | 16.1 (27.9 million )  | 33.3 (12.3 million ) | <0.001 |
| <b>Hypertension</b>          | 38.1 (86.1 million )  | 14.2 (2.3 million )    | 37.6 (65.2 million )  | 50.4 (18.6 million ) | <0.001 |
| <b>Anemia</b>                | 1.8 (4.1 million )    | 0.6 (0.1 million )     | 1.8 (3.1 million )    | 2.5 (0.9 million )   | <0.001 |
| <b>LE8</b>                   | 62.17 (12.03)         | 83.77 (3.16)           | 64.12 (8.02)          | 43.76 (4.91)         | <0.001 |

Data are % ( weighted N ) for categorical measures or mean (SD) for continuous measures.

\*PIR :the rate of income to poverty; Smoker:smoked at least 100 cigarettes in the past; Drinker: had at least 12 alcohol drinkers in lifetime; TC:total cholesterol.

**Table 2. Hazard ratios of cardiovascular health status to all-cause mortality in prediabetes.**

| CVH status (LE8 score) | N    | Model1           |         | Model2           |         | Model3           |         |
|------------------------|------|------------------|---------|------------------|---------|------------------|---------|
|                        |      | HR(95%CI)        | P-value | HR(95%CI)        | P-value | HR(95%CI)        | P-value |
| High(80-100)           | 199  | Reference        |         | Reference        |         | Reference        |         |
| Moderate(50-79)        | 3943 | 4.32(2.10,8.91)  | <0.001  | 2.68(1.34, 5.36) | 0.005   | 2.55(1.23, 5.31) | 0.012   |
| Low(0-49)              | 1202 | 8.39(4.03,17.48) | <0.001  | 4.75(2.27, 9.93) | <0.001  | 3.92(1.70, 9.02) | 0.001   |

Model1: No adjustment. Model2: Adjusted for sex, age, race/ethnicity, and income. Model3: Adjusted for sex, age, race/ethnicity, income, alcohol consumption, smoking, BMI, total cholesterol, diabetes, anemia, hypertension, and cardiovascular disease.
